# Supplementary material for: Triglyceride-glucose index mediates the association between residual cholesterol and stroke among middle-aged and older adults in China: a prospective, nationwide, population-based study
Source: PubMed Central journal article supplement (PMC11660090; doi:10.3389/fcvm.2024.1429993), 2024-12-05
Supplement: Datasheet1.pdf [file Datasheet1.pdf]

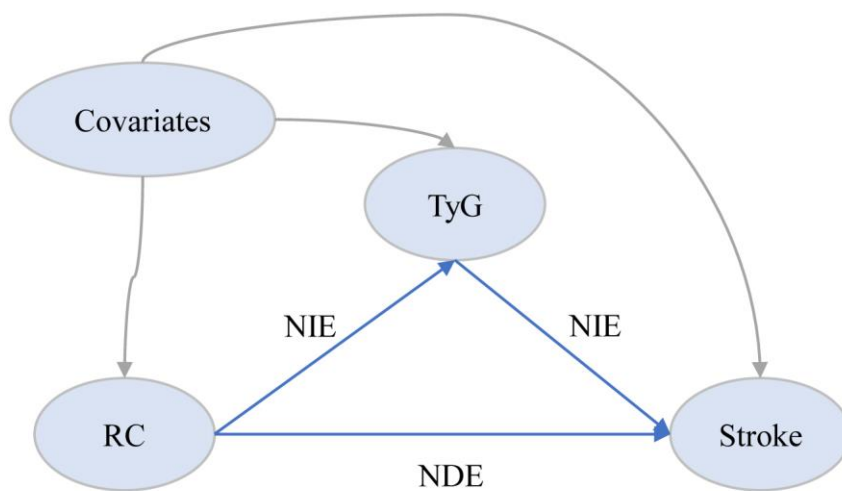

**Figure S1. Mediating pathway of the association of remnant cholesterol with stroke.**

Direct acyclic graph of a structural model of mediation of the association between remnant cholesterol and stroke by triglyceride-glucose index. **Abbreviations:** RC, remnant cholesterol; TyG, triglyceride-glucose; NDE, natural direct effects; NIE, natural indirect effects.

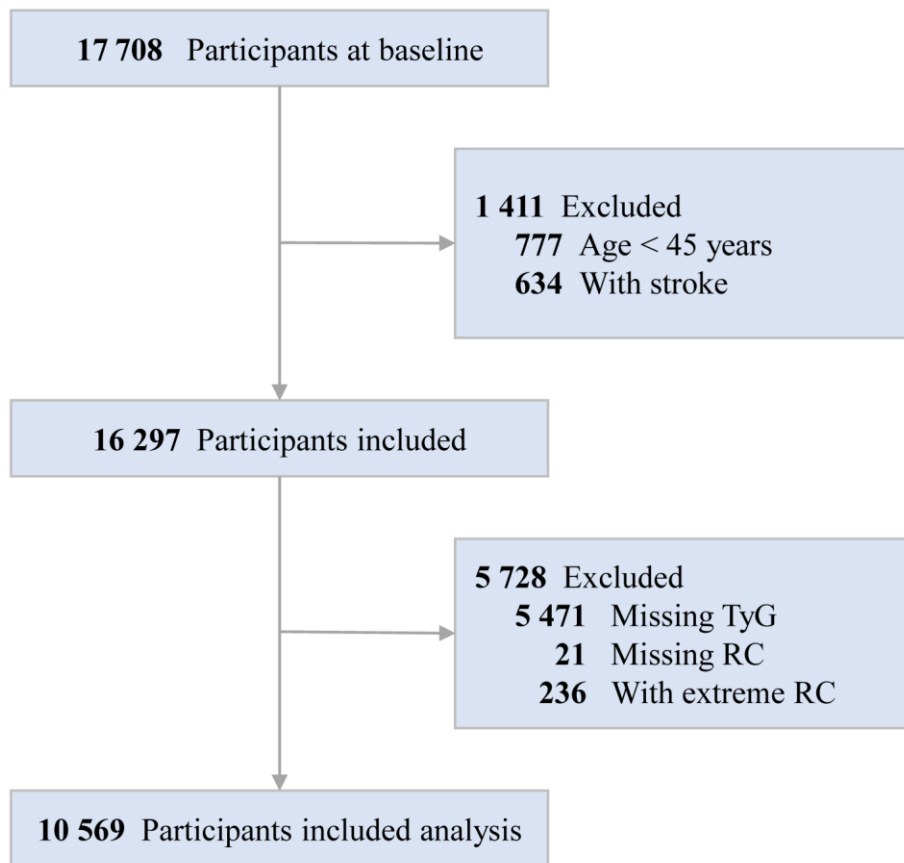

**Figure S2. Flowchart of the study population.**

**Abbreviations:** RC, remnant cholesterol; TyG, triglyceride-glucose.

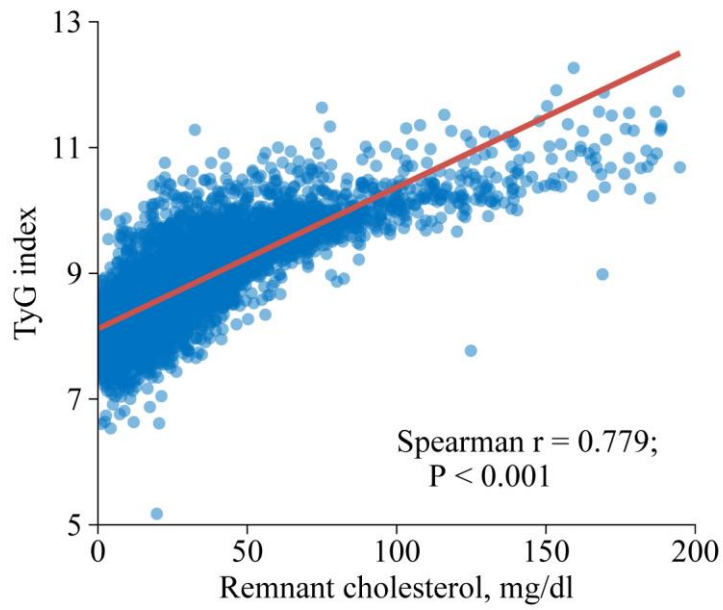

**Figure S3. Spearman correlation analysis of remnant cholesterol and triglyceride-glucose index in subpopulations of 8 515 participants with complete data.**

**Abbreviations:** TyG, triglyceride-glucose.

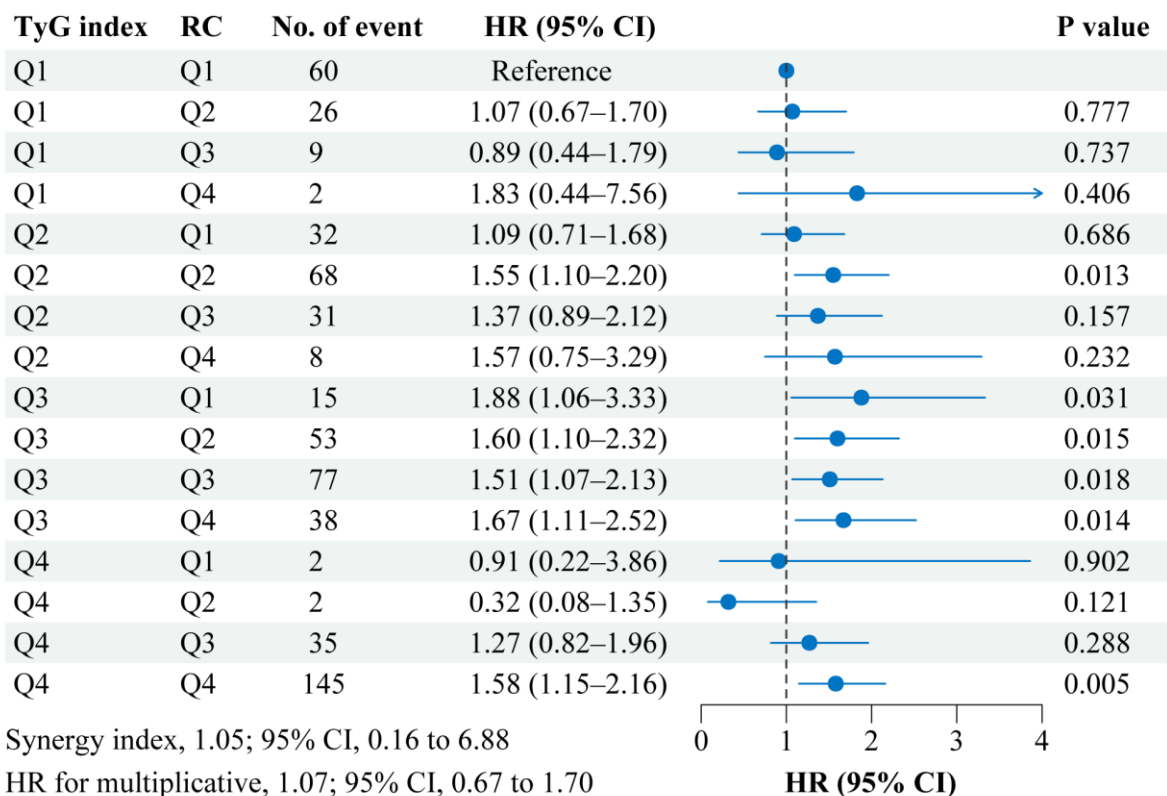

**Figure S4. Interaction and joint effects for triglyceride-glucose index and remnant cholesterol on stroke risk in subpopulations of 8 515 participants with complete data.**

Graphs show the interaction and joint effects of the TyG index and remnant cholesterol with stroke risk. The model was adjusted for age, gender, marital status, residence, education level, body mass index, smoking status, drinking status, diabetes, hypertension, heart disease, dyslipidemia, kidney disease, history of medication use for diabetes, history of medication use for hypertension, history of medication use for dyslipidemia, systole blood pressure, diastolic blood pressure, HbA1c, hsCRP, and eGFR. Additive interaction was evaluated using synergy index (SI) between the TyG index and remnant cholesterol, and the additive interaction was statistically significant when its CI did not include 1. Multiplicative interaction was evaluated using HR for the product term between the TyG index and remnant cholesterol, and the multiplicative interaction was statistically significant when its CI did not include 1.

**Abbreviations:** CI, confidence interval; HR, hazard ratio; Q, quartile, RC, remnant cholesterol; TyG, triglyceride-glucose.

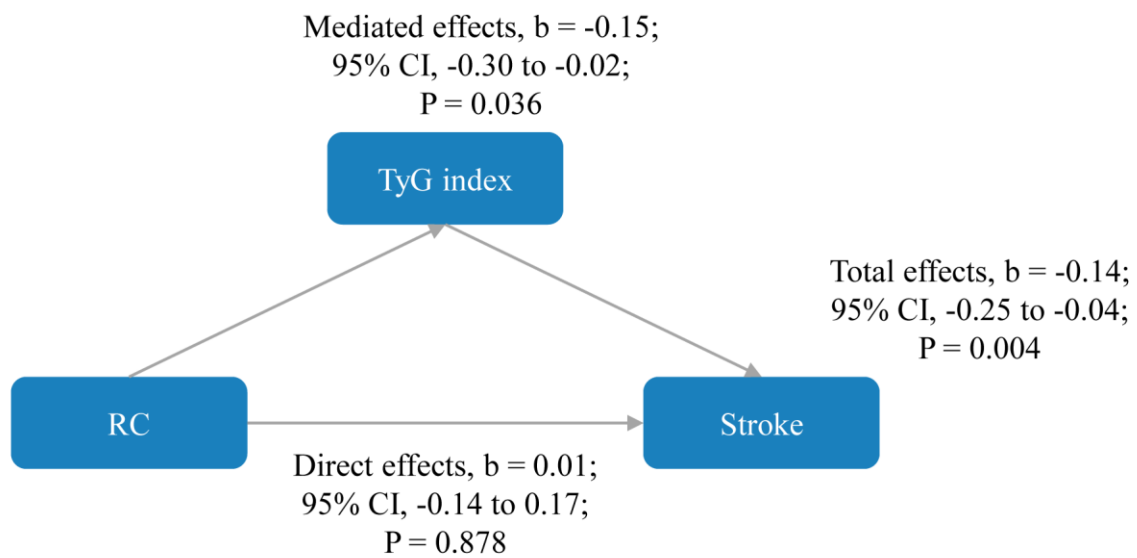

**Figure S5. Mediated effects by triglyceride-glucose index on the associations of remnant cholesterol with stroke risk in subpopulations of 8 515 participants with complete data.**

The model was adjusted for age, gender, marital status, residence, education level, body mass index, smoking status, drinking status, diabetes, hypertension, heart disease, dyslipidemia, kidney disease, history of medication use for diabetes, history of medication use for hypertension, history of medication use for dyslipidemia, systole blood pressure, diastolic blood pressure, HbA1c, hsCRP, and eGFR. **Abbreviations:** CI, confidence interval; RC, remnant cholesterol; TyG, triglyceride-glucose.

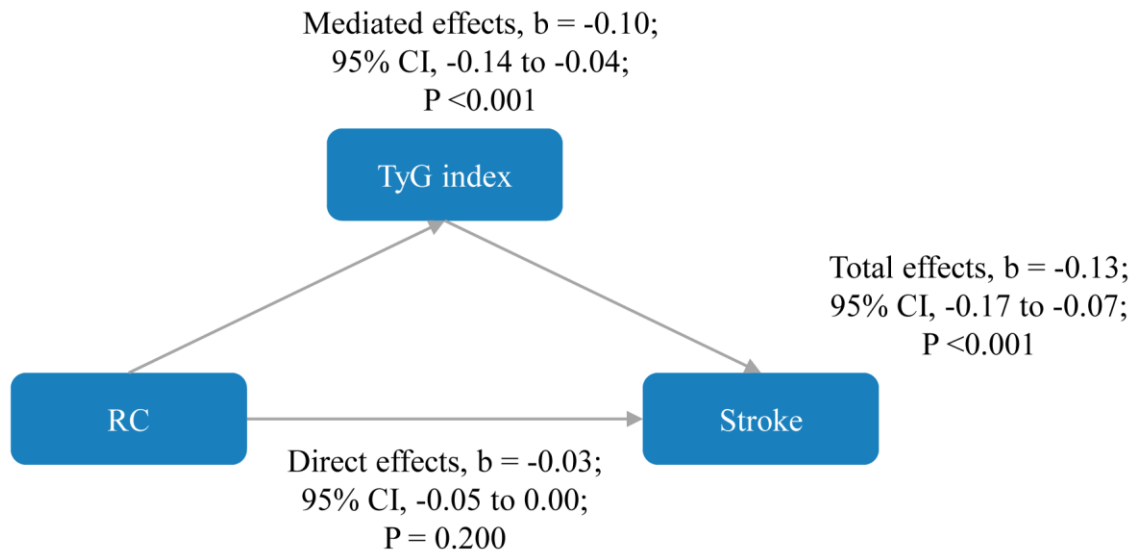

**Figure S6. Mediated effects by triglyceride-glucose index at Wave 3 on the associations of remnant cholesterol with stroke risk**

The model was adjusted for age, gender, marital status, residence, education level, body mass index, smoking status, drinking status, diabetes, hypertension, heart disease, dyslipidemia, kidney disease, history of medication use for diabetes, history of medication use for hypertension, history of medication use for dyslipidemia, systole blood pressure, diastolic blood pressure, HbA1c, hsCRP, and eGFR. **Abbreviations:** CI, confidence interval; RC, remnant cholesterol; TyG, triglyceride-glucose.

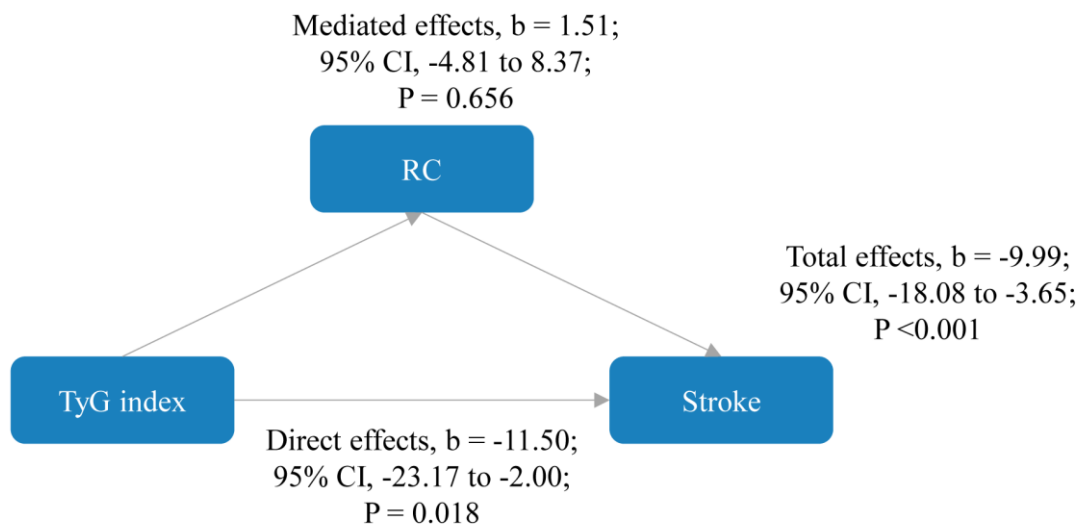

**Figure S7. Mediated effects by remnant cholesterol on the associations of triglyceride-glucose index with stroke risk.**

The model was adjusted for age, gender, marital status, residence, education level, body mass index, smoking status, drinking status, diabetes, hypertension, heart disease, dyslipidemia, kidney disease, history of medication use for diabetes, history of medication use for hypertension, history of medication use for dyslipidemia, systole blood pressure, diastolic blood pressure, HbA1c, hsCRP, and eGFR. **Abbreviations:** CI, confidence interval; RC, remnant cholesterol; TyG, triglyceride-glucose.

**Table S1. Baseline characteristics between participants included and not included**

| Characteristic                     | Exclude (n=7139) | Include (n=10569) | P value <sup>a</sup> |
|------------------------------------|------------------|-------------------|----------------------|
| Age, years                         |                  |                   | <0.001               |
| <60                                | 4241 (59.4%)     | 6002 (56.8%)      |                      |
| ≥60                                | 2723 (38.1%)     | 4567 (43.2%)      |                      |
| Missing                            | 175 (2.5%)       | 0 (0.0%)          |                      |
| Gender                             |                  |                   | 0.011                |
| Male                               | 3500 (49.0%)     | 4978 (47.1%)      |                      |
| Female                             | 3637 (50.9%)     | 5591 (52.9%)      |                      |
| Missing                            | 2 (0.0%)         | 0 (0.0%)          |                      |
| Marital status                     |                  |                   | <0.001               |
| Married                            | 5434 (76.1%)     | 8736 (82.7%)      |                      |
| Other                              | 1693 (23.7%)     | 1833 (17.3%)      |                      |
| Missing                            | 12 (0.2%)        | 0 (0.0%)          |                      |
| Residence                          |                  |                   | <0.001               |
| Urban                              | 3310 (46.4%)     | 3861 (36.5%)      |                      |
| Rural                              | 3829 (53.6%)     | 6708 (63.5%)      |                      |
| Education level                    |                  |                   | <0.001               |
| No formal education                | 1775 (24.9%)     | 3076 (29.1%)      |                      |
| Primary school                     | 2685 (37.6%)     | 4235 (40.1%)      |                      |
| Middle or high school              | 2229 (31.2%)     | 2874 (27.2%)      |                      |
| College or above                   | 434 (6.1%)       | 384 (3.6%)        |                      |
| Missing                            | 16 (0.2%)        | 0 (0.0%)          |                      |
| Smoking status                     |                  |                   | <0.001               |
| Never                              | 4232 (59.3%)     | 6387 (60.4%)      |                      |
| Former                             | 534 (7.5%)       | 883 (8.4%)        |                      |
| Current                            | 1782 (25.0%)     | 3089 (29.2%)      |                      |
| Missing                            | 591 (8.3%)       | 210 (2.0%)        |                      |
| Body mass index, kg/m <sup>2</sup> |                  |                   | 0.160                |
| <18.5                              | 339 (4.7%)       | 610 (5.8%)        |                      |
| 18.5-23.9                          | 2517 (35.3%)     | 4677 (44.3%)      |                      |
| 24.0-27.9                          | 1314 (18.4%)     | 2628 (24.9%)      |                      |
| ≥28.0                              | 510 (7.1%)       | 1036 (9.8%)       |                      |
| Missing                            | 2459 (34.4%)     | 1618 (15.3%)      |                      |
| Drinking status                    |                  |                   | 0.573                |
| Never                              | 4146 (58.1%)     | 6187 (58.5%)      |                      |
| Former                             | 574 (8.0%)       | 869 (8.2%)        |                      |
| Current                            | 2265 (31.7%)     | 3502 (33.1%)      |                      |
| Missing                            | 154 (2.2%)       | 11 (0.1%)         |                      |
| Hypertension                       |                  |                   | 0.039                |



| Characteristic                             | Exclude (n=7139) | Include (n=10569) | P value <sup>a</sup> |
|--------------------------------------------|------------------|-------------------|----------------------|
| No                                         | 5208 (73.0%)     | 5253 (49.7%)      |                      |
| Yes                                        | 1747 (24.5%)     | 4193 (39.7%)      |                      |
| Missing                                    | 184 (2.6%)       | 1123 (10.6%)      |                      |
| Diabetes                                   |                  |                   | 0.893                |
| No                                         | 6514 (91.2%)     | 9832 (93.0%)      |                      |
| Yes                                        | 421 (5.9%)       | 641 (6.1%)        |                      |
| Missing                                    | 204 (2.9%)       | 96 (0.9%)         |                      |
| Heart disease                              |                  |                   | 0.856                |
| No                                         | 6089 (85.3%)     | 9248 (87.5%)      |                      |
| Yes                                        | 850 (11.9%)      | 1280 (12.1%)      |                      |
| Missing                                    | 200 (2.8%)       | 41 (0.4%)         |                      |
| Dyslipidemia                               |                  |                   | 0.499                |
| No                                         | 6188 (86.7%)     | 9329 (88.3%)      |                      |
| Yes                                        | 662 (9.3%)       | 1034 (9.8%)       |                      |
| Missing                                    | 289 (4.0%)       | 206 (1.9%)        |                      |
| Kidney disease                             |                  |                   | 0.080                |
| No                                         | 6572 (92.1%)     | 9901 (93.7%)      |                      |
| Yes                                        | 363 (5.1%)       | 616 (5.8%)        |                      |
| Missing                                    | 204 (2.9%)       | 52 (0.5%)         |                      |
| History of medication use for hypertension |                  |                   | 0.331                |
| No                                         | 5616 (78.7%)     | 8430 (79.8%)      |                      |
| Yes                                        | 1334 (18.7%)     | 2080 (19.7%)      |                      |
| Missing                                    | 189 (2.6%)       | 59 (0.6%)         |                      |
| History of medication use for diabetes     |                  |                   | 0.294                |
| No                                         | 6635 (92.9%)     | 10057 (95.2%)     |                      |
| Yes                                        | 297 (4.2%)       | 415 (3.9%)        |                      |
| Missing                                    | 207 (2.9%)       | 97 (0.9%)         |                      |
| History of medication use for dyslipidemia |                  |                   | 0.843                |
| No                                         | 6498 (91.0%)     | 9838 (93.1%)      |                      |
| Yes                                        | 347 (4.9%)       | 518 (4.9%)        |                      |
| Missing                                    | 294 (4.1%)       | 213 (2.0%)        |                      |
| Systole blood pressure, mmHg               |                  |                   | 0.863                |
| Mean±SD                                    | 129.54±21.74     | 129.61±21.46      |                      |
| Missing                                    | 2378 (33.3%)     | 1590 (15.0%)      |                      |
| Diastolic blood pressure, mmHg             |                  |                   | 0.105                |
| Mean±SD                                    | 75.72±12.32      | 75.36±12.22       |                      |
| Missing                                    | 2378 (33.3%)     | 1591 (15.0%)      |                      |
| FBG, mg/dl                                 |                  |                   | 0.869                |
| Mean±SD                                    | 110.10±41.25     | 110.32±36.92      |                      |
| Missing                                    | 6072 (85.1%)     | 0                 |                      |

| Characteristic         | Exclude (n=7139)      | Include (n=10569)      | P value <sup>a</sup> |
|------------------------|-----------------------|------------------------|----------------------|
| TC, mg/dl              |                       |                        | 0.036                |
| Mean±SD                | 190.13±47.50          | 193.26±37.89           |                      |
| Missing                | 6053 (84.8%)          | 0                      |                      |
| TG, mg/dl              |                       |                        | <0.001               |
| Median (IQR)           | 97.35 (66.38, 158.41) | 107.08 (76.11, 156.65) |                      |
| Missing                | 6052 (84.8%)          | 0                      |                      |
| HDL-C, mg/dl           |                       |                        | 0.948                |
| Mean±SD                | 50.88±18.10           | 50.84±15.01            |                      |
| Missing                | 6045 (84.7%)          | 0                      |                      |
| LDL-C, mg/dl           |                       |                        | <0.001               |
| Mean±SD                | 110.79±35.85          | 116.52±34.77           |                      |
| Missing                | 6066 (85.0%)          | 0                      |                      |
| hs-CRP, mg/l           |                       |                        | 0.011                |
| Median (IQR)           | 0.99 (0.48, 2.12)     | 1.04 (0.56, 2.21)      |                      |
| Missing                | 6044 (84.7%)          | 0                      |                      |
| HbA1c, %               |                       |                        | 0.003                |
| Mean±SD                | 5.20±0.82             | 5.27±0.82              |                      |
| Missing                | 5910 (82.8%)          | 92                     |                      |
| TyG index <sup>b</sup> |                       |                        | 0.250                |
| Mean±SD                | 8.67±0.93             | 8.70±0.65              |                      |
| Missing                | 6072 (85.1%)          | 0                      |                      |
| RC, mg/dl <sup>c</sup> |                       |                        | <0.001               |
| Median (IQR)           | 16.62 (5.80, 30.25)   | 20.10 (11.98, 32.09)   |                      |
| Missing                | 6079 (85.2%)          | 0                      |                      |

Data were presented as n(%), unless otherwise specified.

Abbreviations: FBG: fast blood glucose; HbA1c: glycated hemoglobin; HDL-C: high-density lipoprotein cholesterol; hsCRP, high-sensitivity C-reactive protein; IQR: interquartile range; LDL-C: low-density lipoprotein cholesterol; RC, remnant cholesterol; SD: standard deviation; TC: total cholesterol; TyG: triglyceride-glucose.

<sup>a</sup> P value was based on the  $\chi^2$  test, Mann-Whitney U test, or analysis of variance test where appropriate

<sup>b</sup> TyG index was calculated by the formula  $\ln[\text{Triglyceride (mg/dl)} \times \text{Fasting blood glucose (mg/dl)} / 2]$ .

<sup>c</sup> RC was calculated by the formula  $\text{TC (mg/dl)} - \text{LDL-C (mg/dl)} - \text{HDL-C (mg/dl)}$ .

**Table S2. Associations of triglyceride-glucose index and remnant cholesterol with stroke risk by competing risk analysis**

| Variables           | No. of event / total | Model 1 <sup>a</sup> |         | Model 2 <sup>b</sup> |         | Model 3 <sup>c</sup> |         |
|---------------------|----------------------|----------------------|---------|----------------------|---------|----------------------|---------|
|                     |                      | HR (95% CI)          | P value | HR (95% CI)          | P value | HR (95% CI)          | P value |
| TyG index           |                      |                      |         |                      |         |                      |         |
| Quartile            |                      |                      |         |                      |         |                      |         |
| Q1 [5.18, 8.25]     | 120 / 2643           | Reference            |         | Reference            |         | Reference            |         |
| Q2 (8.25, 8.62]     | 157 / 2642           | 1.31 (1.04–1.66)     | 0.024   | 1.26 (1.00–1.60)     | 0.053   | 1.22 (0.96–1.55)     | 0.100   |
| Q3 (8.62, 9.07]     | 205 / 2642           | 1.73 (1.38–2.17)     | <0.001  | 1.56 (1.24–1.96)     | <0.001  | 1.41 (1.12–1.78)     | 0.003   |
| Q4 (9.07, 12.3]     | 225 / 2642           | 1.93 (1.55–2.41)     | <0.001  | 1.66 (1.32–2.09)     | <0.001  | 1.39 (1.10–1.77)     | 0.006   |
| Per-1-SD increase   | 707 / 10569          | 1.27 (1.19–1.36)     | <0.001  | 1.21 (1.13–1.29)     | <0.001  | 1.13 (1.05–1.22)     | 0.001   |
| Remnant cholesterol |                      |                      |         |                      |         |                      |         |
| Quartile            |                      |                      |         |                      |         |                      |         |
| Q1 [0.39, 12.00]    | 135 / 2647           | Reference            |         | Reference            |         | Reference            |         |
| Q2 (12.00, 20.10]   | 174 / 2643           | 1.34 (1.08–1.68)     | 0.009   | 1.29 (1.03–1.61)     | 0.027   | 1.25 (1.00–1.56)     | 0.052   |
| Q3 (20.10, 32.10]   | 169 / 2642           | 1.31 (1.05–1.64)     | 0.018   | 1.21 (0.97–1.52)     | 0.096   | 1.15 (0.92–1.44)     | 0.232   |
| Q4 (32.10, 195.00]  | 229 / 2637           | 1.82 (1.48–2.25)     | <0.001  | 1.57 (1.27–1.95)     | <0.001  | 1.43 (1.15–1.77)     | 0.001   |
| Per-1-SD increase   | 707 / 10569          | 1.18 (1.12–1.24)     | <0.001  | 1.13 (1.07–1.20)     | <0.001  | 1.08 (1.02–1.15)     | 0.007   |

Abbreviations: CI, confidence interval; HR, hazard ratio; SD, standard deviation; TyG, triglyceride-glucose; Q, quartile.

<sup>a</sup> Adjusted for age and gender.

<sup>b</sup> Adjusted for age, gender, marital status, residence, education level, body mass index, smoking status, and drinking status.

<sup>c</sup> Adjusted as model 2 plus diabetes, hypertension, heart disease, dyslipidemia, kidney disease, history of medication use for diabetes, history of medication use for hypertension, history of medication use for dyslipidemia, systole blood pressure, diastolic blood pressure, HbA1c, hsCRP, and eGFR.

**Table S3. Associations of triglyceride-glucose index and remnant cholesterol with stroke risk in subpopulations of 8 515 participants with complete data**

| Variables           | No. of event / total | Model 1 <sup>a</sup> |         | Model 2 <sup>b</sup> |         | Model 3 <sup>c</sup> |         |
|---------------------|----------------------|----------------------|---------|----------------------|---------|----------------------|---------|
|                     |                      | HR (95% CI)          | P value | HR (95% CI)          | P value | HR (95% CI)          | P value |
| TyG index           |                      |                      |         |                      |         |                      |         |
| Quartile            |                      |                      |         |                      |         |                      |         |
| Q1 [5.18, 8.25]     | 97 / 2180            | Reference            |         | Reference            |         | Reference            |         |
| Q2 (8.25, 8.62]     | 139 / 2128           | 1.47 (1.13–1.91)     | 0.004   | 1.41 (1.09–1.83)     | 0.009   | 1.36 (1.05–1.76)     | 0.022   |
| Q3 (8.62, 9.07]     | 183 / 2124           | 1.96 (1.53–2.52)     | <0.001  | 1.75 (1.36–2.25)     | <0.001  | 1.57 (1.22–2.02)     | <0.001  |
| Q4 (9.07, 12.3]     | 184 / 2083           | 2.06 (1.61–2.64)     | <0.001  | 1.75 (1.36–2.26)     | <0.001  | 1.44 (1.10–1.88)     | 0.007   |
| Per-1-SD increase   | 603 / 8515           | 1.30 (1.21–1.40)     | <0.001  | 1.23 (1.14–1.33)     | <0.001  | 1.15 (1.06–1.26)     | 0.001   |
| Remnant cholesterol |                      |                      |         |                      |         |                      |         |
| Quartile            |                      |                      |         |                      |         |                      |         |
| Q1 [0.39, 12.00]    | 109 / 2123           | Reference            |         | Reference            |         | Reference            |         |
| Q2 (12.00, 20.10]   | 149 / 2161           | 1.38 (1.08–1.77)     | 0.011   | 1.32 (1.03–1.69)     | 0.030   | 1.26 (0.98–1.62)     | 0.066   |
| Q3 (20.10, 32.10]   | 152 / 2118           | 1.45 (1.13–1.85)     | 0.003   | 1.32 (1.03–1.70)     | 0.027   | 1.24 (0.97–1.60)     | 0.085   |
| Q4 (32.10, 195.00]  | 193 / 2113           | 1.90 (1.51–2.41)     | <0.001  | 1.63 (1.28–2.07)     | <0.001  | 1.45 (1.14–1.85)     | 0.003   |
| Per-1-SD increase   | 603 / 8515           | 1.20 (1.13–1.28)     | <0.001  | 1.15 (1.08–1.23)     | <0.001  | 1.10 (1.03–1.18)     | 0.005   |

Abbreviations: CI, confidence interval; HR, hazard ratio; SD, standard deviation; TyG, triglyceride-glucose; Q, quartile.

<sup>a</sup> Adjusted for age and gender.

<sup>b</sup> Adjusted for age, gender, marital status, residence, education level, body mass index, smoking status, and drinking status.

<sup>c</sup> Adjusted as model 2 plus diabetes, hypertension, heart disease, dyslipidemia, kidney disease, history of medication use for diabetes, history of medication use for hypertension, history of medication use for dyslipidemia, systole blood pressure, diastolic blood pressure, HbA1c, hsCRP, and eGFR.
